# Supplementary material for: Sparse Binary Relation Representations for Genome Graph Annotation
Source: bioRxiv or medRxiv preprint supplement (doi:10.1101/468512), 2019-01-25
Supplement: Supplementary file [file 468512-1.pdf]

# Supplementary Material

## Sparse Binary Relation Representations for Genome Graph Annotation

Mikhail Karasikov<sup>1,2,3</sup>, Harun Mustafa<sup>1,2,3</sup>, Amir Joudaki<sup>1,2</sup>, Sara Javadzadeh No<sup>1</sup>,  
Gunnar Rätsch<sup>1,2,3</sup>, and André Kahles<sup>1,2,3</sup>

<sup>1</sup> Department of Computer Science, ETH Zurich, Zurich, Switzerland

<sup>2</sup> University Hospital Zurich, Biomedical Informatics Research, Zurich, Switzerland

<sup>3</sup> SIB Swiss Institute of Bioinformatics, Zurich, Switzerland {raetsch, andre.kahles}@inf.ethz.ch

### 1 Binary relation matrix simulation

To benchmark our compression techniques systematically, we generated three series of random binary matrices satisfying different properties. Given fixed matrix dimensions  $n \times m$ , an expected column density  $d$ , and a uniqueness factor  $u$ , we define our generation schemes as follows:

1. **Random:** generate  $m$  random columns of length  $n$  with expected density  $d$
2. **Uniform rows:** generate  $m$  random columns of length  $\frac{n}{u}$ , then duplicate each row  $u$  times
3. **Uniform columns:** generate  $\frac{m}{u}$  columns of length  $n$ , then duplicate each column  $u$  times

For each generated column, its indices are iterated through linearly and the values of the indices are set by drawing observations from a random variable  $X \sim \text{Bernoulli}(d)$ . For all experiments, values of  $n = 1,000,000$ ,  $u = 5$ , and  $d = 0.01$  were used. The values  $m \in \{500, 1000, 3000\}$  were used.

#### 1.1 Sizes of compressed representations

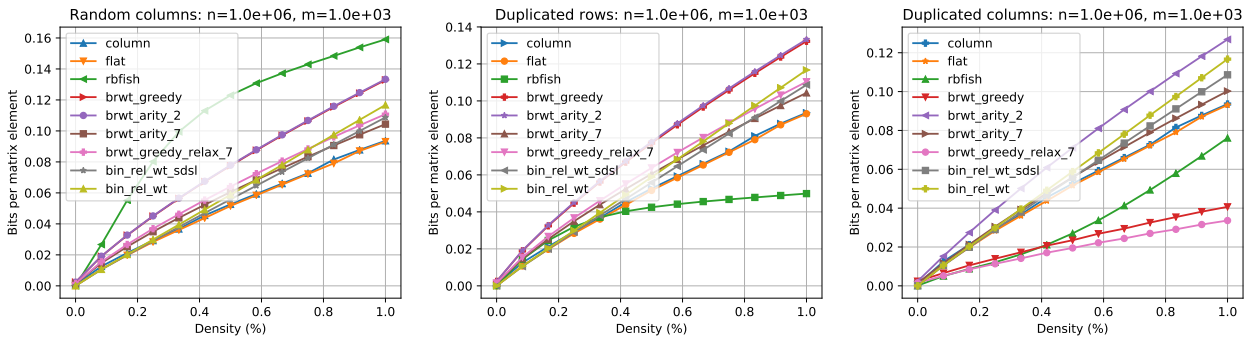

**Fig. 1.** Size of the representation of  $A \in \{0,1\}^{10^6 \times 1000}$  with densities  $d < 0.01$  using different approaches: a) Random columns; b) Duplicated rows; c) Duplicated columns

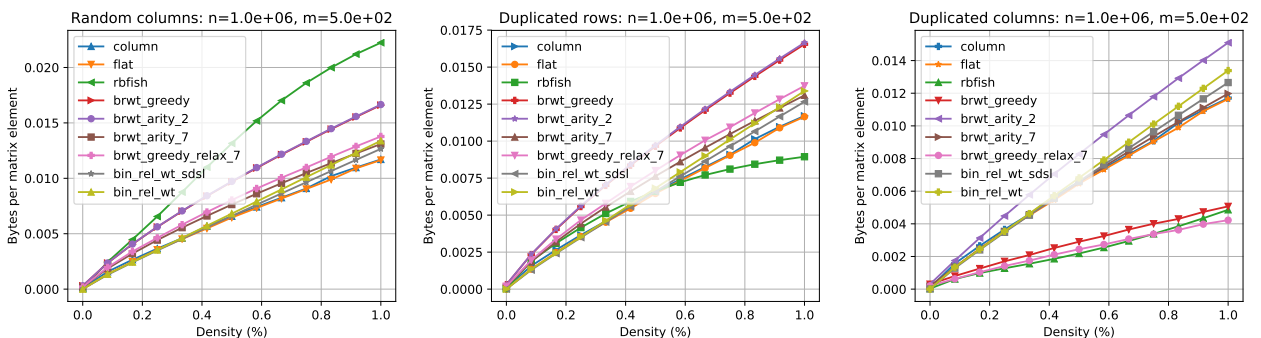

**Fig. 2.** Size of the representation of  $A \in \{0,1\}^{10^6 \times 500}$  with densities  $d < 0.01$  using different approaches: a) Random columns; b) Duplicated rows; c) Duplicated columns

## 2 Subsampling lemma

*Proof.* Suppose for  $i \in \{1, \dots, n\}$  we introduce random variable  $X_i$  as follows:

$$X_i = \begin{cases} 1 & \text{if } i \in \mathcal{S}, \\ 0 & \text{otherwise.} \end{cases}$$

In other words  $X_i$  is 1 if  $i$  is subsampled and 0 otherwise. Besides, for  $V \subseteq \{1, \dots, n\}$  we define  $X_V = \sum_{i \in V} X_i$ , which basically counts how many elements of  $V$  are subsampled. Based on these definitions can derive

$$\begin{aligned} X_{o_i \cup o_j} &= |(o_i \cup o_j) \cap [n]_p| = |\tilde{o}_i \cup \tilde{o}_j| = p \tilde{u}_{i,j}, \\ \mathbb{E}[X_{o_i \cup o_j}] &= p \cdot |o_i \cup o_j| = p u_{i,j}. \end{aligned}$$

If we denote the mean by  $\mu_{i,j} = \mathbb{E}[X_{o_i \cup o_j}]$  we have

$$\begin{aligned} \Pr(|\tilde{u}_{i,j} - u_{i,j}| \geq \epsilon u_{i,j}) &= \Pr\left(\left|\frac{1}{p} X_{o_i \cup o_j} - \frac{1}{p} \mu_{i,j}\right| \geq \frac{1}{p} \epsilon \mu_{i,j}\right) \\ &= \Pr\left(|X_{o_i \cup o_j} - \mu_{i,j}| \geq \epsilon \mu_{i,j}\right). \end{aligned}$$

Using Chernoff bound we have

$$\begin{aligned} \Pr\left(|X_{o_i \cup o_j} - \mu_{i,j}| \geq \epsilon \mu_{i,j}\right) &\leq 2e^{-\epsilon^2 \mu_{i,j}/3} && \triangleright \text{Chernoff} \\ &= 2e^{-\epsilon^2 |o_i \cup o_j| \frac{12 \log m}{d \epsilon^2} \frac{1}{3}} && \triangleright \text{plugging } p \\ &\leq 2m^{-12/3} && \triangleright |o_i \cup o_j| \geq |o_i| \geq d \end{aligned}$$

and, therefore,

$$\Pr(|\tilde{u}_{i,j} - u_{i,j}| \geq \epsilon u_{i,j}) \leq 2m^{-4}. \quad (1)$$

Now back to the joint probability we can write

$$\begin{aligned} \Pr\left(\bigvee_{i,j \in [m]} |\tilde{u}_{i,j} - u_{i,j}| \geq \epsilon u_{i,j}\right) &\leq \sum_{i < j} \Pr(|\tilde{u}_{i,j} - u_{i,j}| \geq \epsilon u_{i,j}) && \triangleright \text{union bound} \\ &< \frac{m^2}{2} \cdot 2m^{-4} && \triangleright \text{by inequality 1} \\ &= m^{-2}. \end{aligned}$$

Finally, taking the compliment of the probability gives us the claimed bound:

$$\Pr\left(\bigwedge_{i,j \in [m]} |\tilde{u}_{i,j} - u_{i,j}| \leq \epsilon u_{i,j}\right) > 1 - m^{-2}.$$
