# Supplementary material for: Sparse Binary Relation Representations for Genome Graph Annotation
Source: bioRxiv or medRxiv preprint supplement (doi:10.1101/468512), 2019-01-25
Supplement: Supplementary file [file media-1.pdf]

# Supplementary Material

## Sparse Binary Relation Representations for Genome Graph Annotation

Mikhail Karasikov<sup>1,2,3</sup>, Harun Mustafa<sup>1,2,3</sup>, Amir Joudaki<sup>1,2,3</sup>, Sara Javadzadeh-No<sup>1</sup>,  
Gunnar Rätsch<sup>1,2,3</sup>, and André Kahles<sup>1,2,3</sup>

<sup>1</sup> Department of Computer Science, ETH Zurich, Zurich 8092, Switzerland  
{raetsch, andre.kahles}@inf.ethz.ch  
<http://bmi.inf.ethz.ch>

<sup>2</sup> University Hospital Zurich, Biomedical Informatics Research, Zurich 8091, Switzerland

<sup>3</sup> SIB Swiss Institute of Bioinformatics, Lausanne 1015, Switzerland

### 1 Binary relation matrix simulation

To benchmark our compression techniques systematically, we generated three series of random binary matrices satisfying different properties. Given fixed matrix dimensions  $n \times m$ , an expected column density  $d$ , and a uniqueness factor  $u$ , we define our generation schemes as follows:

1. **Random:** generate  $m$  random columns of length  $n$  with expected density  $d$
2. **Uniform rows:** generate  $m$  random columns of length  $\frac{n}{u}$ , then duplicate each row  $u$  times
3. **Uniform columns:** generate  $\frac{m}{u}$  columns of length  $n$ , then duplicate each column  $u$  times

For each generated column, its indices are iterated through linearly and the values of the indices are set by drawing observations from a random variable  $X \sim \text{Bernoulli}(d)$ . For all experiments, values of  $n = 1,000,000$ ,  $u = 5$ , and  $d = 0.01$  were used. The values  $m \in \{500, 1000, 3000\}$  were used.

#### 1.1 Sizes of compressed representations

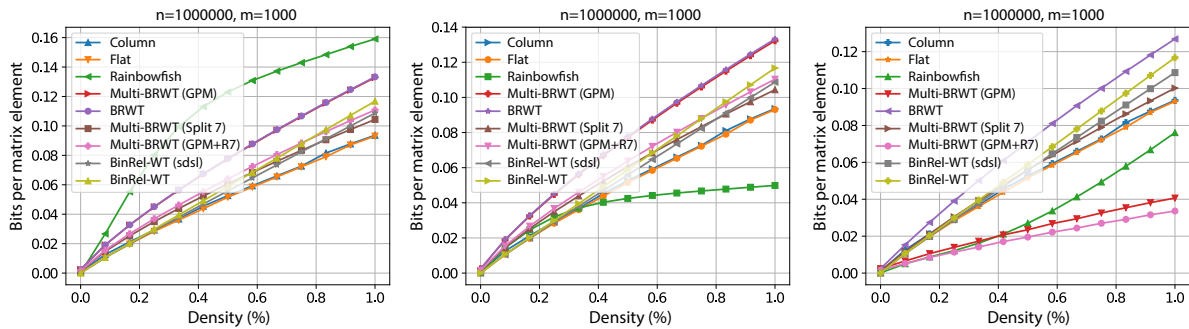

**Fig. 1.** Size of the representation of  $A \in \{0,1\}^{10^6 \times 1000}$  with densities  $d < 0.01$  using different approaches: a) Random columns; b) Duplicated rows; c) Duplicated columns.

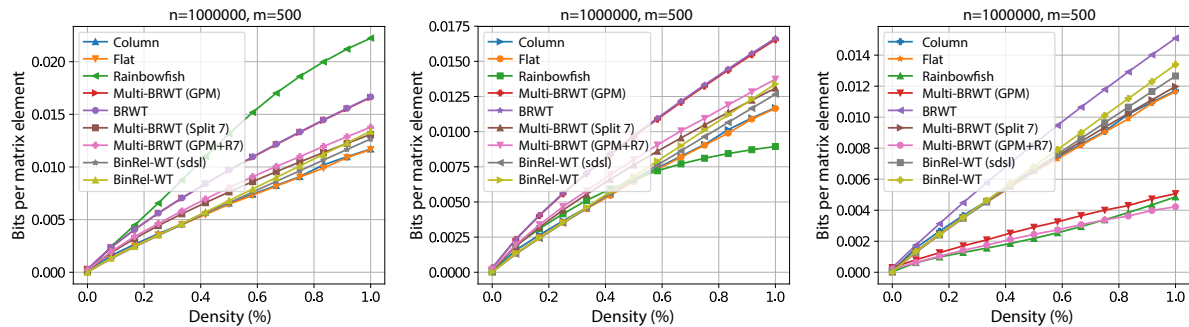

**Fig. 2.** Size of the representation of  $A \in \{0,1\}^{10^6 \times 500}$  with densities  $d < 0.01$  using different approaches: a) Random columns; b) Duplicated rows; c) Duplicated columns.

## 2 Subsampling lemma

*Proof (Subsampling lemma).* For each  $i \in \{1, \dots, n\}$ , we introduce a random variable  $X_i$  as follows:

$$X_i = \begin{cases} 1 & \text{if } i \in S, \\ 0 & \text{otherwise.} \end{cases}$$

In other words,  $X_i$  is 1 if  $i$  is subsampled (i.e.,  $S \ni i$ ), and 0 otherwise. In addition, for each subset  $V \subset \{1, \dots, n\}$ , we define  $X_V = \sum_{i \in V} X_i = |V \cap S|$ , which counts how many elements of  $V$  are subsampled. Thus,

$$\begin{aligned} X_{o_i \cup o_j} &= |(o_i \cup o_j) \cap S| = |\tilde{o}_i \cup \tilde{o}_j| = p \hat{u}_{ij}, \\ \mathbb{E}X_{o_i \cup o_j} &= |o_i \cup o_j| \cdot \mathbb{E}X_1 = |o_i \cup o_j| \cdot p = p u_{ij}. \end{aligned}$$

Now we derive

$$\begin{aligned} \Pr(|\hat{u}_{ij} - u_{ij}| \geq \varepsilon u_{ij}) &= \Pr\left(\left|\frac{1}{p}X_{o_i \cup o_j} - \frac{1}{p}\mathbb{E}X_{o_i \cup o_j}\right| \geq \frac{1}{p}\varepsilon\mathbb{E}X_{o_i \cup o_j}\right) \\ &= \Pr\left(|X_{o_i \cup o_j} - \mathbb{E}X_{o_i \cup o_j}| \geq \varepsilon\mathbb{E}X_{o_i \cup o_j}\right), \end{aligned}$$

and use the Chernoff bound for  $\varepsilon \in (0, 1)$

$$\Pr\left(|X_{o_i \cup o_j} - \mathbb{E}X_{o_i \cup o_j}| \geq \varepsilon\mathbb{E}X_{o_i \cup o_j}\right) \leq 2e^{-\varepsilon^2\mathbb{E}X_{o_i \cup o_j}/3} = 2e^{-\varepsilon^2 p u_{ij}/3} \leq 2e^{-\varepsilon^2 p d/3}. \quad (1)$$

Therefore, we can bound the joint probability as follows:

$$\begin{aligned} \Pr\left(\bigcap_{i,j=1}^m \left\{|\hat{u}_{ij} - u_{ij}| < \varepsilon u_{ij}\right\}\right) &= 1 - \Pr\left(\bigcup_{i,j=1}^m \left\{|\hat{u}_{ij} - u_{ij}| \geq \varepsilon u_{ij}\right\}\right) \\ &\geq 1 - \sum_{i \leq j} \Pr(|\hat{u}_{ij} - u_{ij}| \geq \varepsilon u_{ij}) && \triangleright \text{union bound} \\ &\geq 1 - \frac{m^2 + m}{2} \cdot 2e^{-\varepsilon^2 p d/3}. && \triangleright \text{by inequality (1)} \end{aligned}$$

Finally, we reformulate this result in the following equivalent form:

$$\Pr\left(\bigcap_{i,j=1}^m \left\{|\hat{u}_{ij} - u_{ij}| < \varepsilon u_{ij}\right\}\right) \geq 1 - \delta,$$

if  $\delta \geq (m^2 + m)e^{-\varepsilon^2 p d/3}$  or, equivalently, if

$$p \geq \frac{3 \ln\left(\frac{m^2 + m}{\delta}\right)}{d\varepsilon^2}.$$

**Table 1.** The measured size of the compressed binary relation matrix for different methods in Gigabytes (G). A block size of 127 was used for the underlying RRR vectors.

| <b>Methods</b>              | <b>Kingsford</b> | <b>RefSeq</b> |
|-----------------------------|------------------|---------------|
| Column                      | 36.56            | 80.18         |
| Flat                        | 41.21            | 121.60        |
| Rainbowfish                 | 19.22            | -             |
| BinRel-WT                   | 49.57            | -             |
| BinRel-WT (sdsl)            | 31.40            | -             |
| BRWT                        | <b>12.97</b>     | <b>51.82</b>  |
| Multi-BRWT (Split 3)        | 12.24            | -             |
| Multi-BRWT (Split 5)        | <b>12.01</b>     | 48.25         |
| Multi-BRWT (Split 7)        | 12.13            | <b>48.18</b>  |
| Multi-BRWT (Split 10)       | 12.28            | 48.65         |
| Multi-BRWT (Split 13)       | 12.61            | 49.36         |
| Multi-BRWT (GPM)            | 9.68             | 48.10         |
| Multi-BRWT (GPM + Relax 3)  | 9.36             | 45.45         |
| Multi-BRWT (GPM + Relax 5)  | <b>9.19</b>      | 42.75         |
| Multi-BRWT (GPM + Relax 7)  | 9.21             | -             |
| Multi-BRWT (GPM + Relax 10) | 9.22             | -             |
| Multi-BRWT (GPM + Relax 20) | 9.22             | <b>42.28</b>  |
